# Supplementary material for: Automated and Manual Quantification of Tumour Cellularity in Digital Slides for Tumour Burden Assessment
Source: PubMed Central journal article supplement (PMC6773948; doi:10.1038/s41598-019-50568-4), 2019-10-01

# **Automated and Manual Quantification of Tumour Cellularity in Digital Slides for Tumour Burden Assessment**

Shazia Akbar<sup>1,2,3</sup>, Mohammad Peikari<sup>2</sup>, Sherine Salama<sup>4</sup>, Azadeh Y. Panah<sup>4</sup>, Sharon Nofech-Mozes<sup>4</sup>, and Anne L. Martel<sup>1,2,3</sup>

<sup>1</sup>Physical Sciences, Sunnybrook Research Institute, Toronto, Canada

<sup>2</sup>Medical Biophysics, University of Toronto, Toronto, Canada

<sup>3</sup>Vector Institute, Toronto, Canada

<sup>4</sup>Sunnybrook Health Sciences Centre, Toronto, Canada



0% 25% 50% 75% 100%

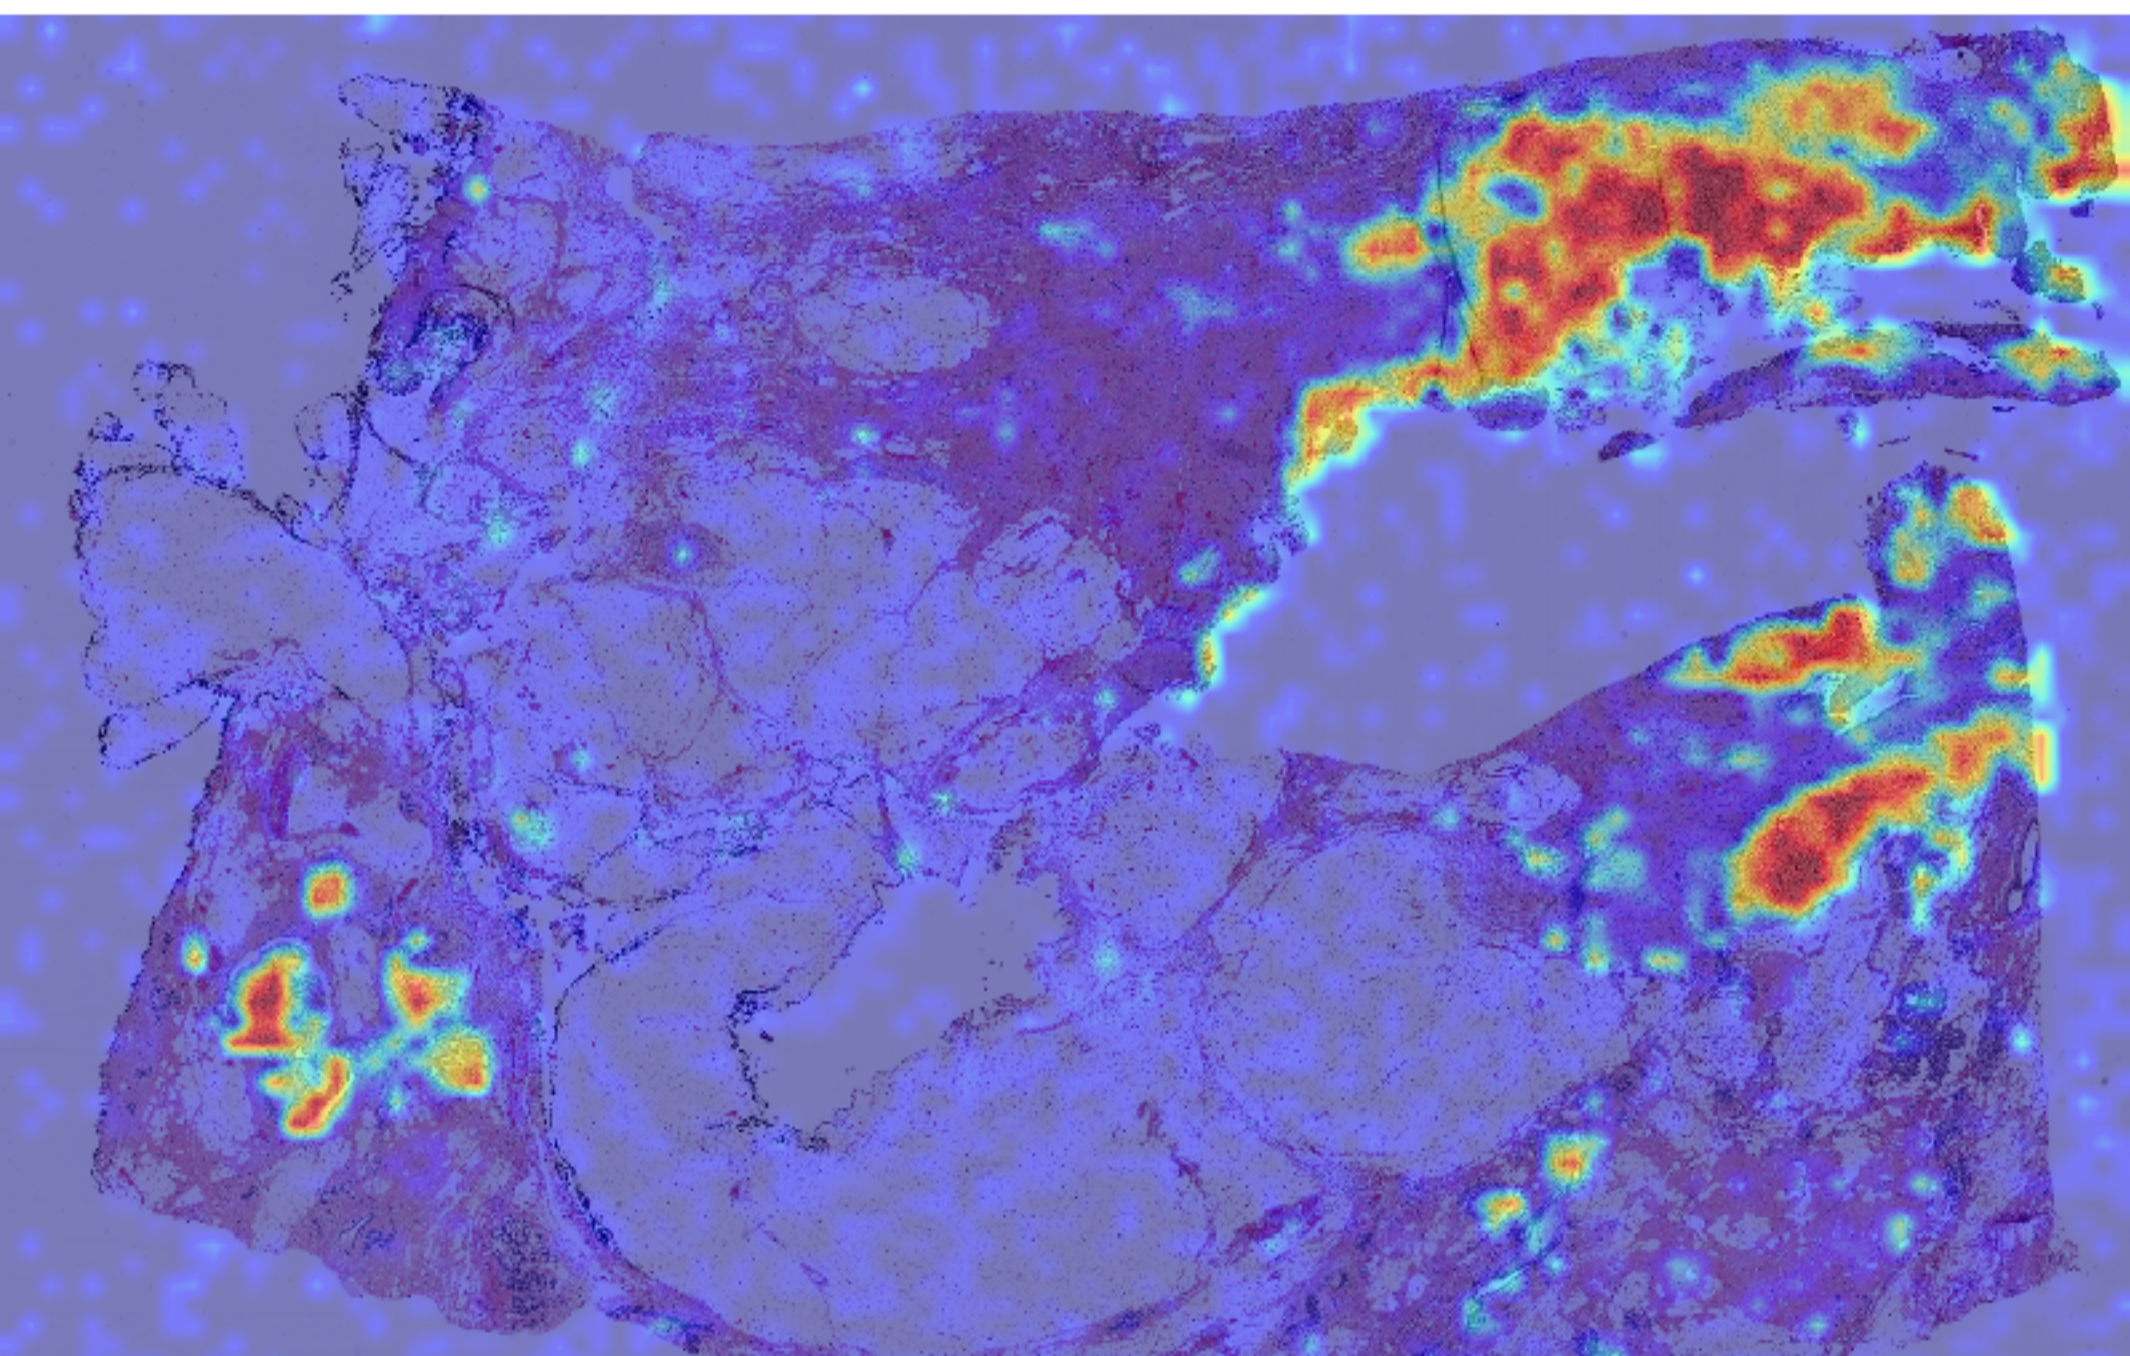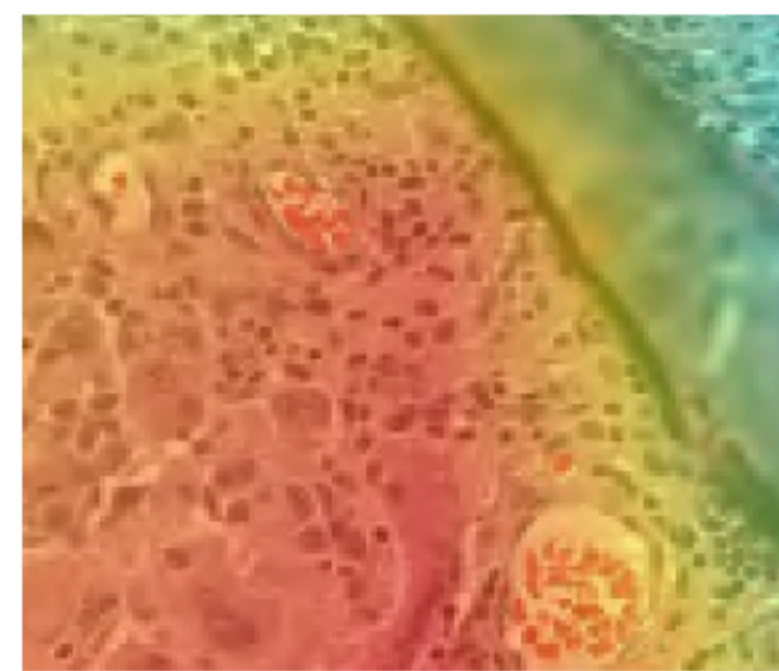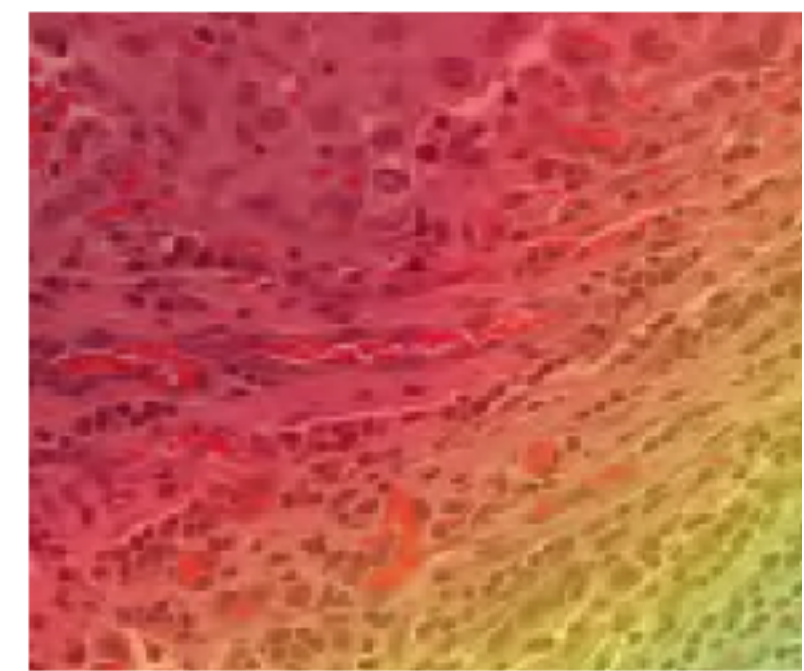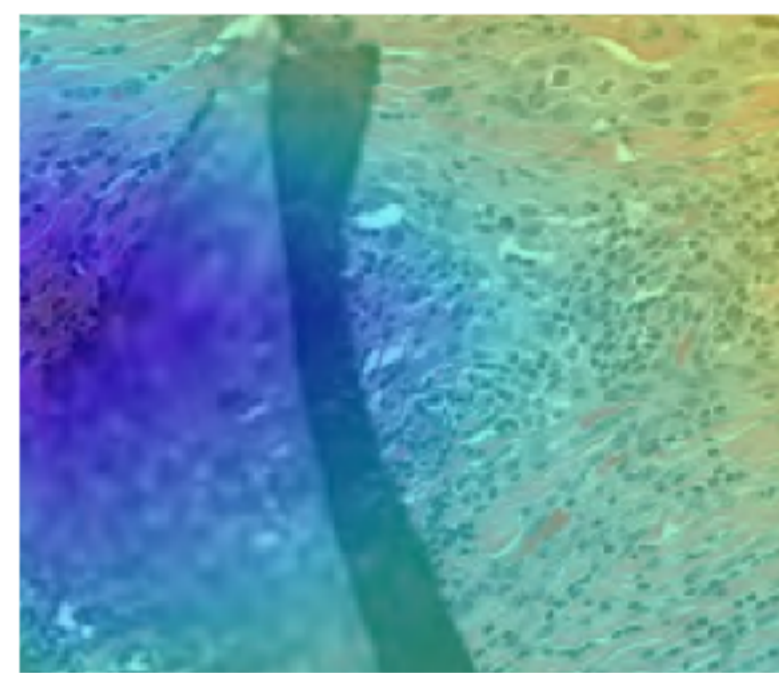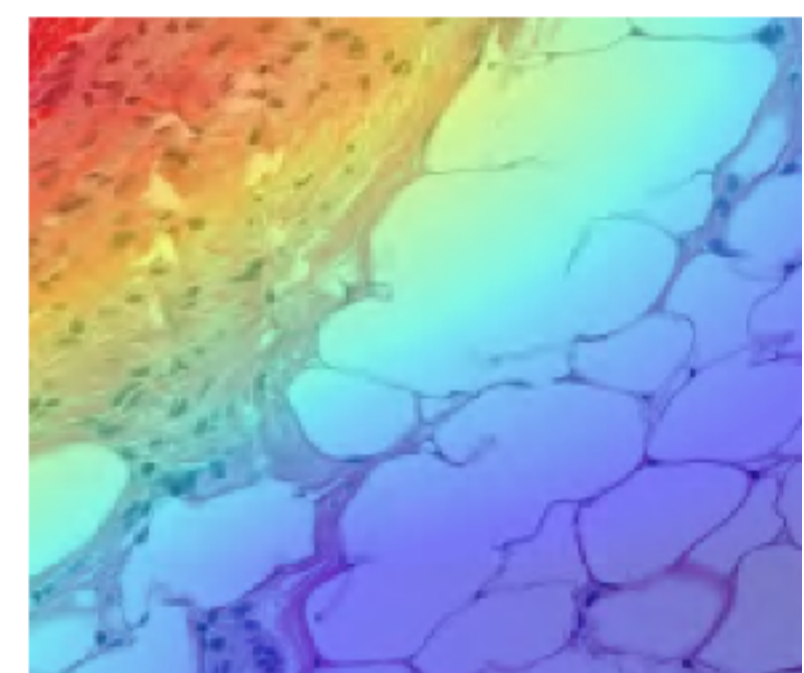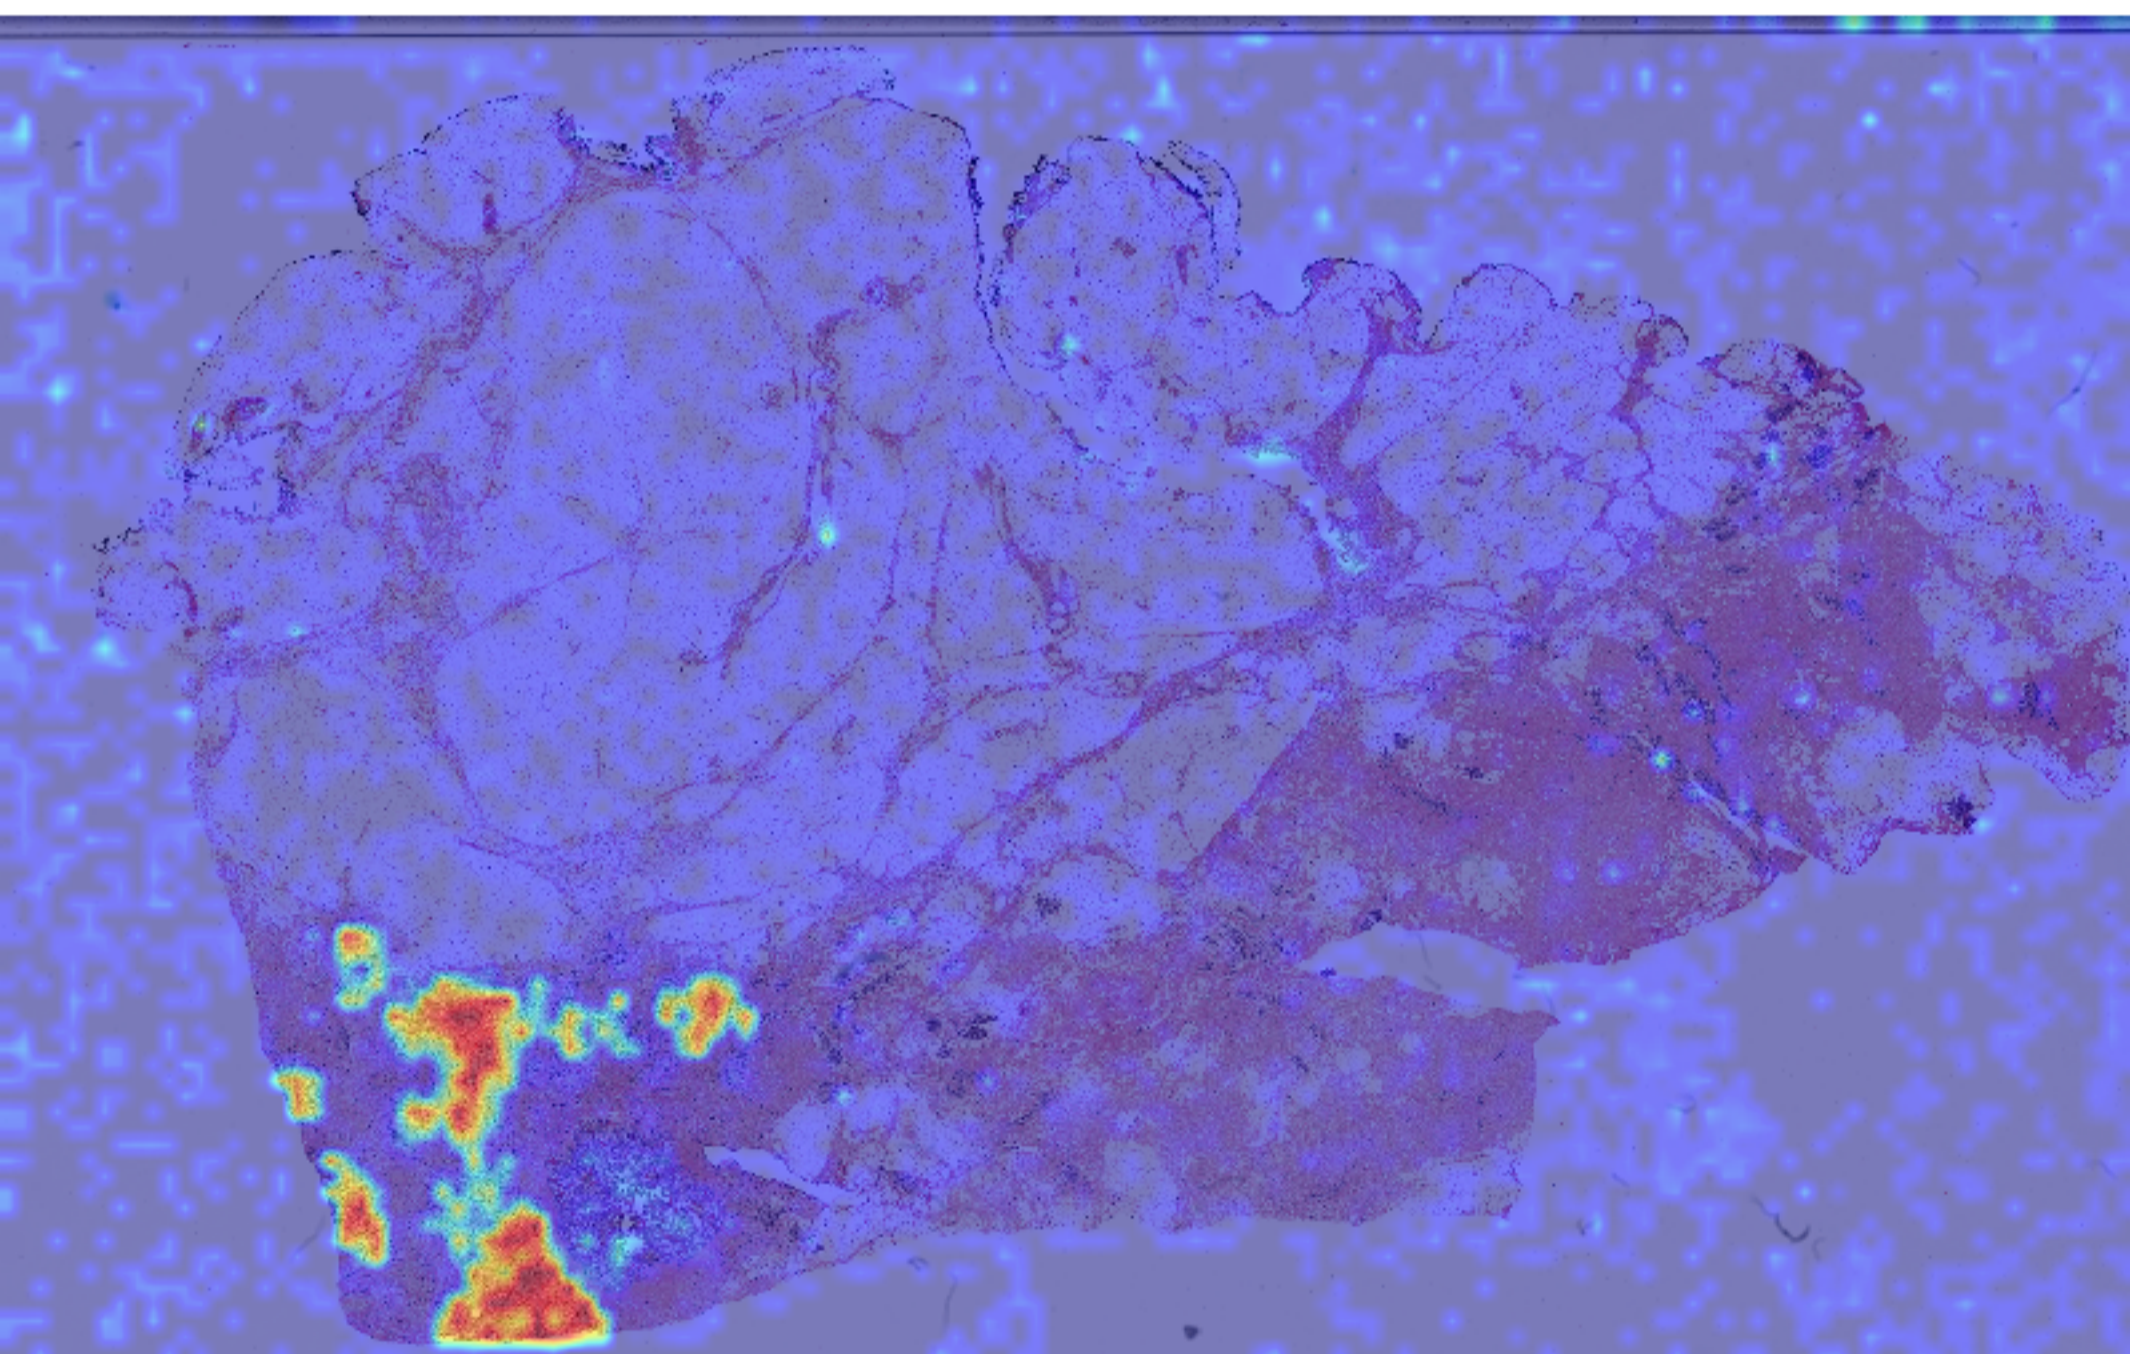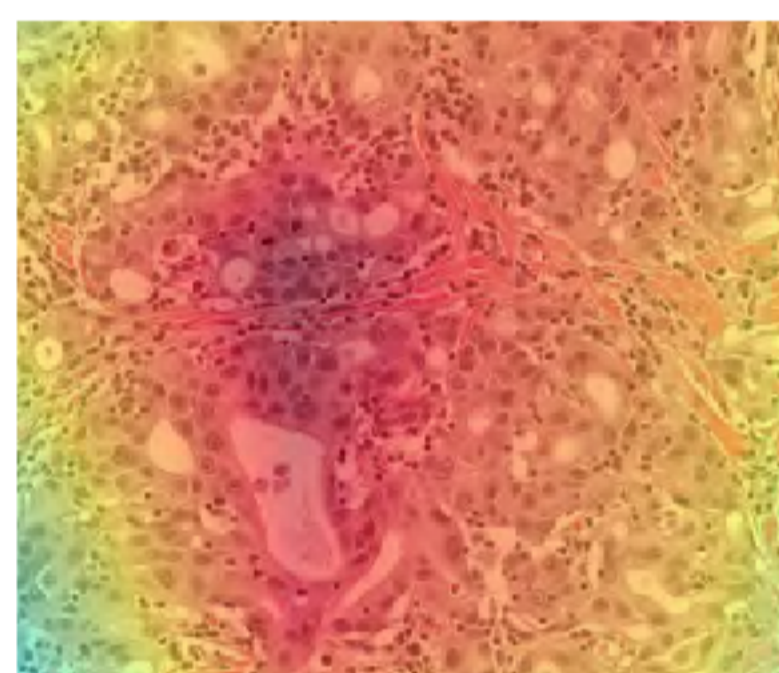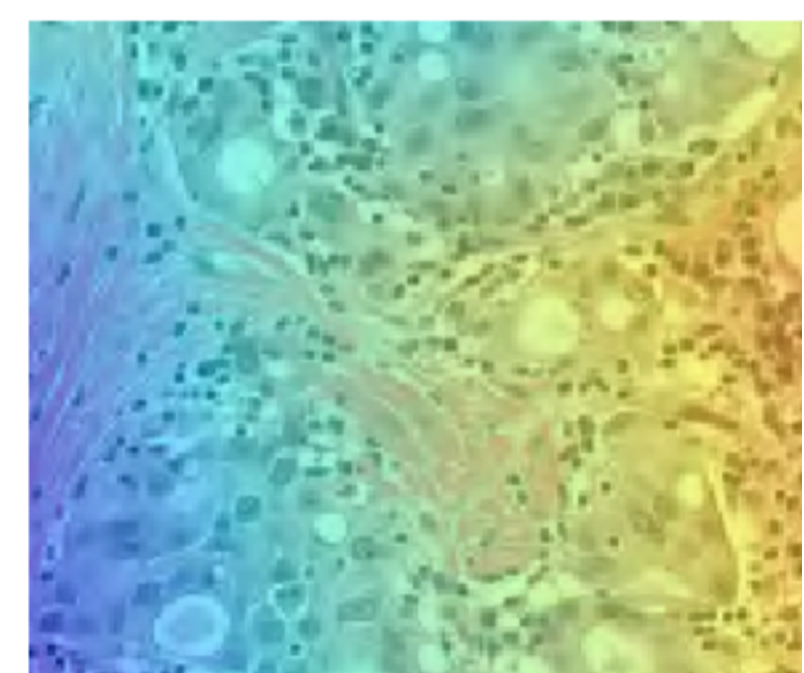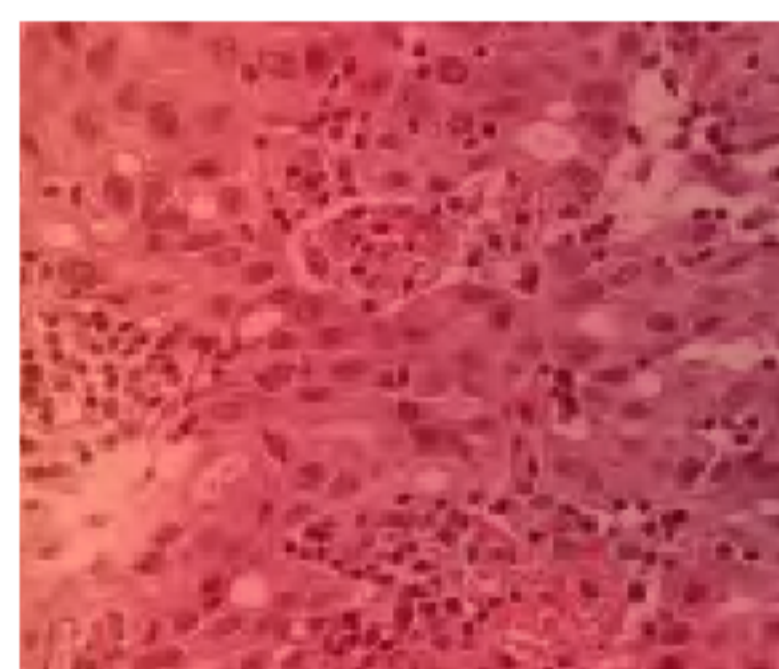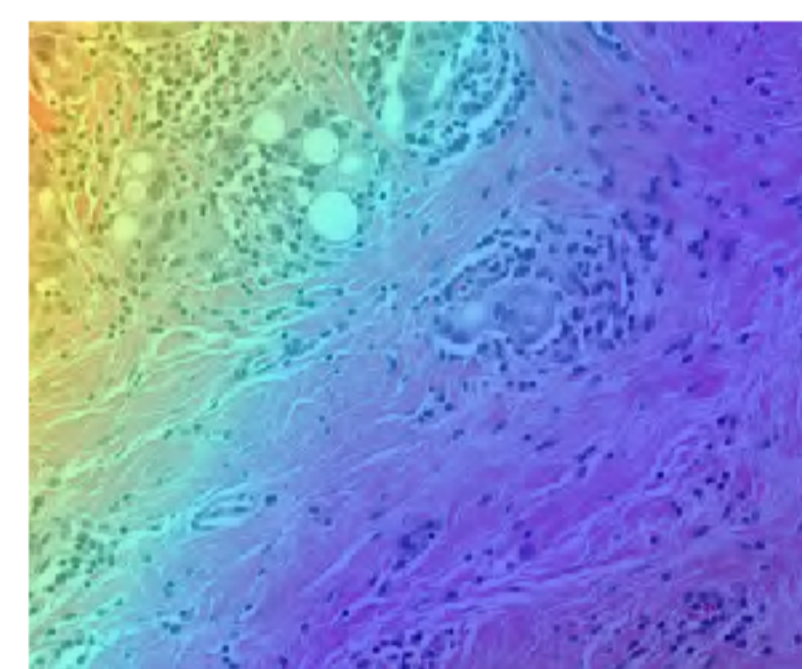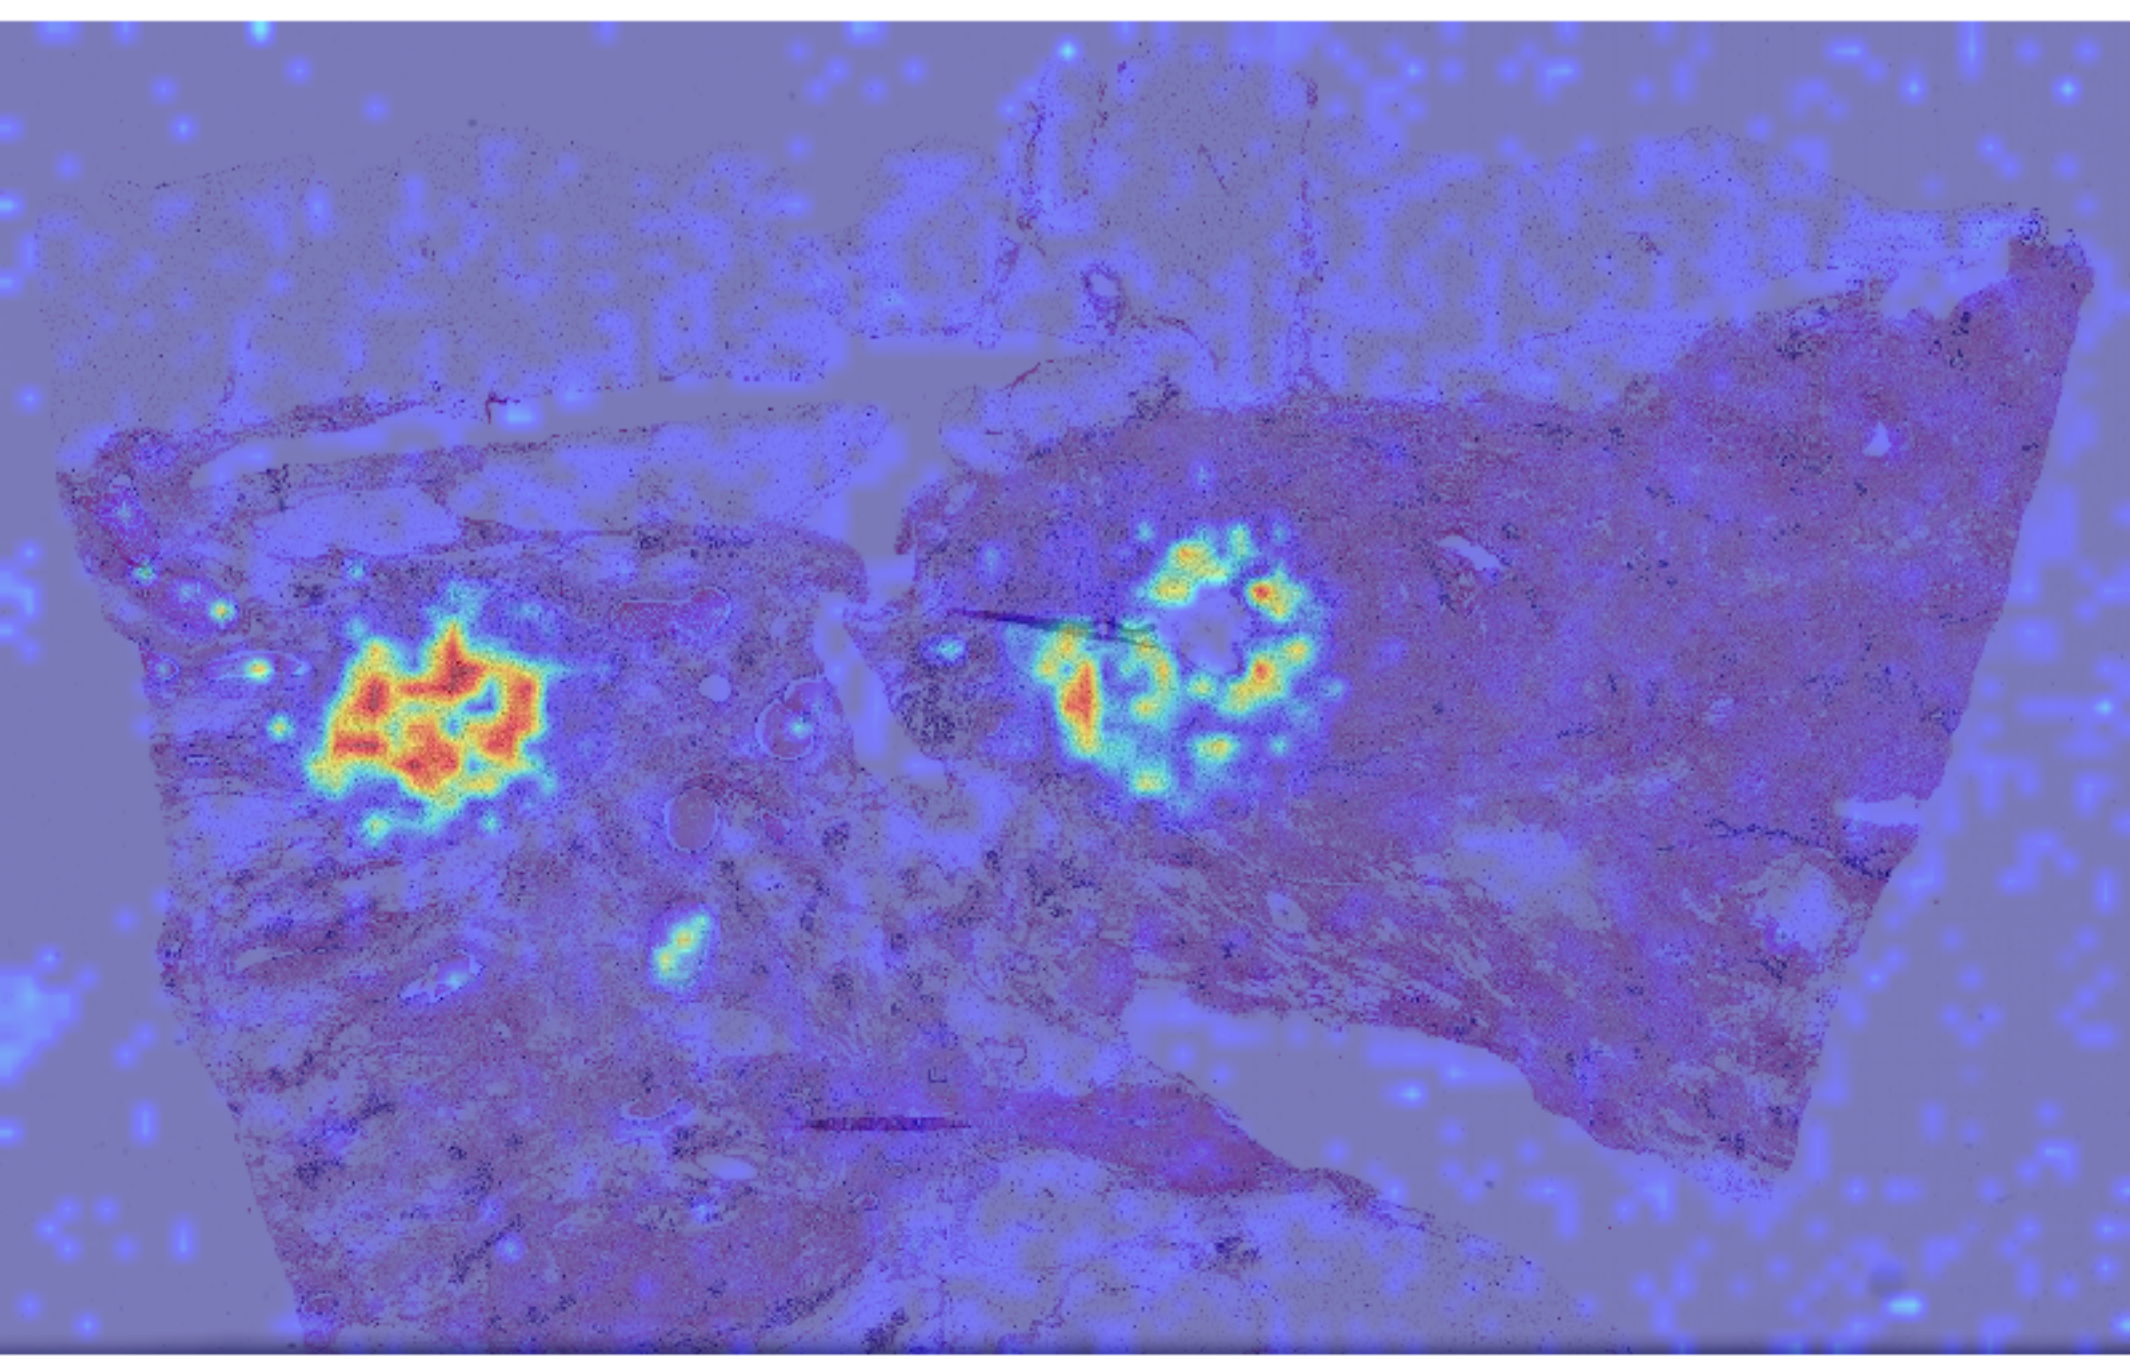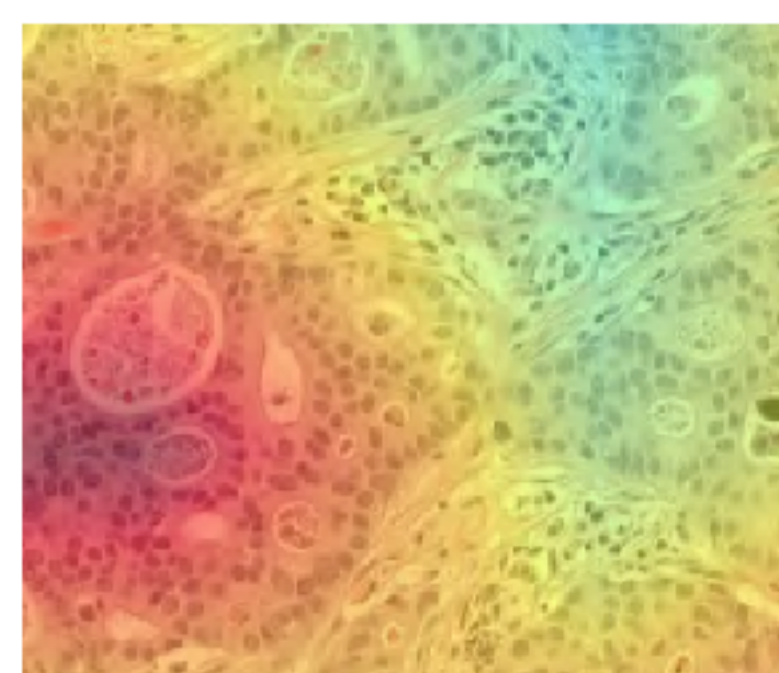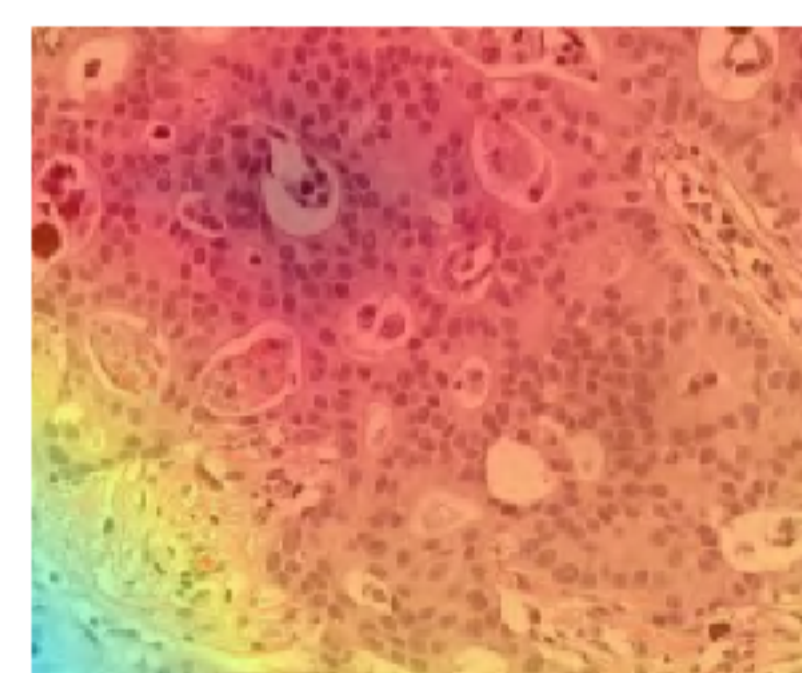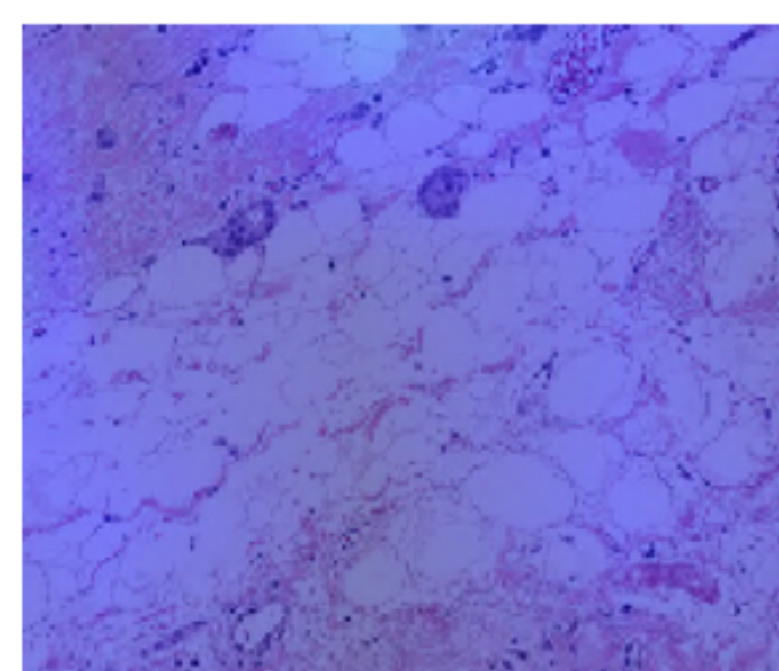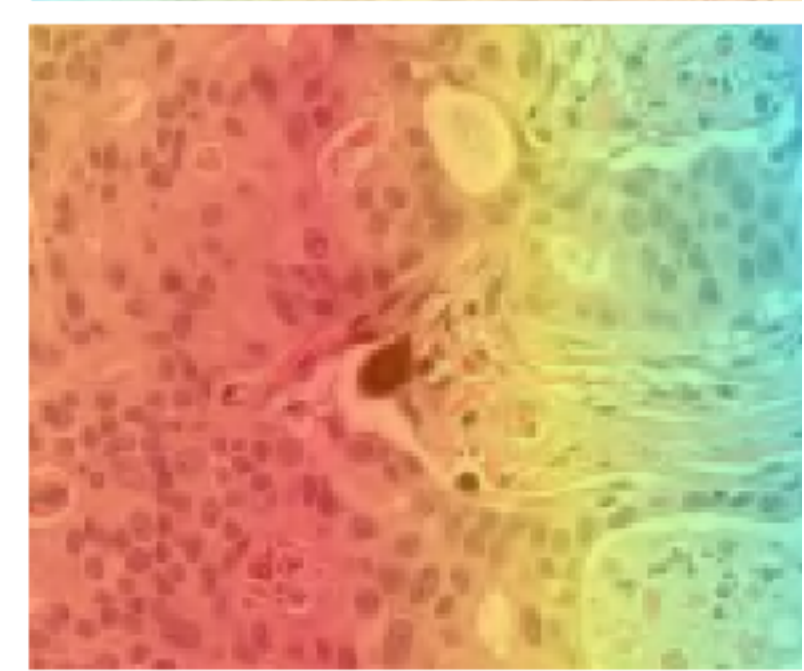

Supplement: 41598_2019_50568_MOESM2_ESM.pdf [file 41598_2019_50568_MOESM2_ESM.pdf]
